# Supplementary material
Source: ML conference proceedings conference paper supplement (https://openaccess.thecvf.com/content/ICCV_2017/html/Wen_Joint_Adaptive_Sparsity_ICCV_2017_paper.html)
Supplement: Supplementary file 1 [file Wen_Joint_Adaptive_Sparsity_ICCV_2017_supplemental.zip]

Archive with 5 entries (5 files):
- iccv2017_supp_package/colorStefan_sigma20.mp4
- iccv2017_supp_package/gbicycle_sigma20.mp4
- iccv2017_supp_package/iccv2017_supp.pdf
- iccv2017_supp_package/readme.txt
- iccv2017_supp_package/stefan_cif_sigma20.mp4
