# Supplementary material
Source: ML conference proceedings conference paper supplement (https://openaccess.thecvf.com/content/ICCV_2017/html/Wen_Joint_Adaptive_Sparsity_ICCV_2017_paper.html)
Supplement: Supplementary file 1 [file Wen_Joint_Adaptive_Sparsity_ICCV_2017_supplemental.zip › iccv2017_supp_package/readme.txt]

% Joint Adaptive Sparsity and Low-Rankness on the Fly: an Online Tensor Reconstruction Scheme for Video Denoising %
(Supplementary Material Package)


%%%%%%%%%%%%%%%%%%%%%%%%%%%%%%%%%%%%%%%%%%%%%%%%%%%%%%%%%%%%%%%%%%%%%%%%%
Content List:
Document 
	Main Document 			- 	iccv2017_supp.pdf
Video Examples
	1.Denoised Video 'gbicycle'	- 	gbicycle_sigma20.mp4
		- Top left		: 	clean video Flower
		- Top right		: 	noisy video, sigma = 20
		- Bottom left 	:	denoised video by SALT
		- Bottom right 	: 	denoised bideo by VIDOSAT
	2. Denoised Video 'Stefan'	- 	stefan_sigma20.mp4
		- Top left		: 	clean video Stefan
		- Top right		: 	noisy video, sigma = 20
		- Bottom left 	:	denoised video by SALT
		- Bottom right 	: 	denoised bideo by VBM4D+
	3. Denoised Video 'colorStefan'	- 	colorStefan_sigma20.mp4
		- Top left		: 	clean video Stefan
		- Top right		: 	noisy video, sigma = 20
		- Bottom left 	:	denoised video by SALT
		- Bottom right 	: 	denoised bideo by RGB channel-wise VBM3D
	
